# Supplementary material for: Difference in virulence between Neisseria meningitidis serogroups W and Y in transgenic mice
Source: PubMed Central journal article supplement (PMC7160935; doi:10.1186/s12866-020-01760-4), 2020-04-15

**Additional file 1. Neighbour-net network of *Neisseria meningitidis* serogroup W isolates included in the study.** Coloured dots represent different years. PubMLST ID is displayed for each isolate in the network. The nasopharynx/throat isolates of the 2013 strain are marked with a star (\*). All isolates were clonal complex 11 except for isolate 57572, which was sequence type 1287.

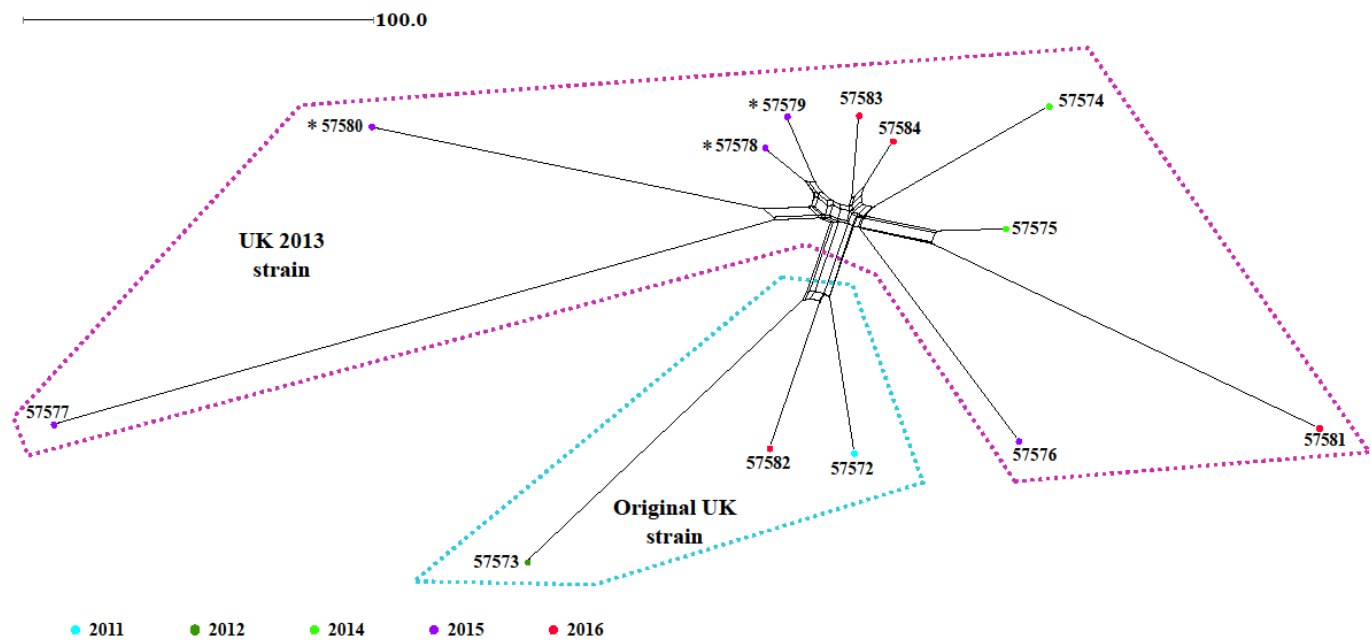

Supplement: 12866_2020_1760_MOESM1_ESM.pdf [file 12866_2020_1760_MOESM1_ESM.pdf]
