# Supplementary material for: Difference in virulence between Neisseria meningitidis serogroups W and Y in transgenic mice
Source: PubMed Central journal article supplement (PMC7160935; doi:10.1186/s12866-020-01760-4), 2020-04-15

**Additional file 2. Neighbour-net network of *Neisseria meningitidis* serogroup Y isolates from Sweden included in the study.** Coloured dots represent different years. PubMLST ID is displayed for each isolate in the network. All isolates were clonal complex 23 except isolate 41611, which was sequence type 4183.

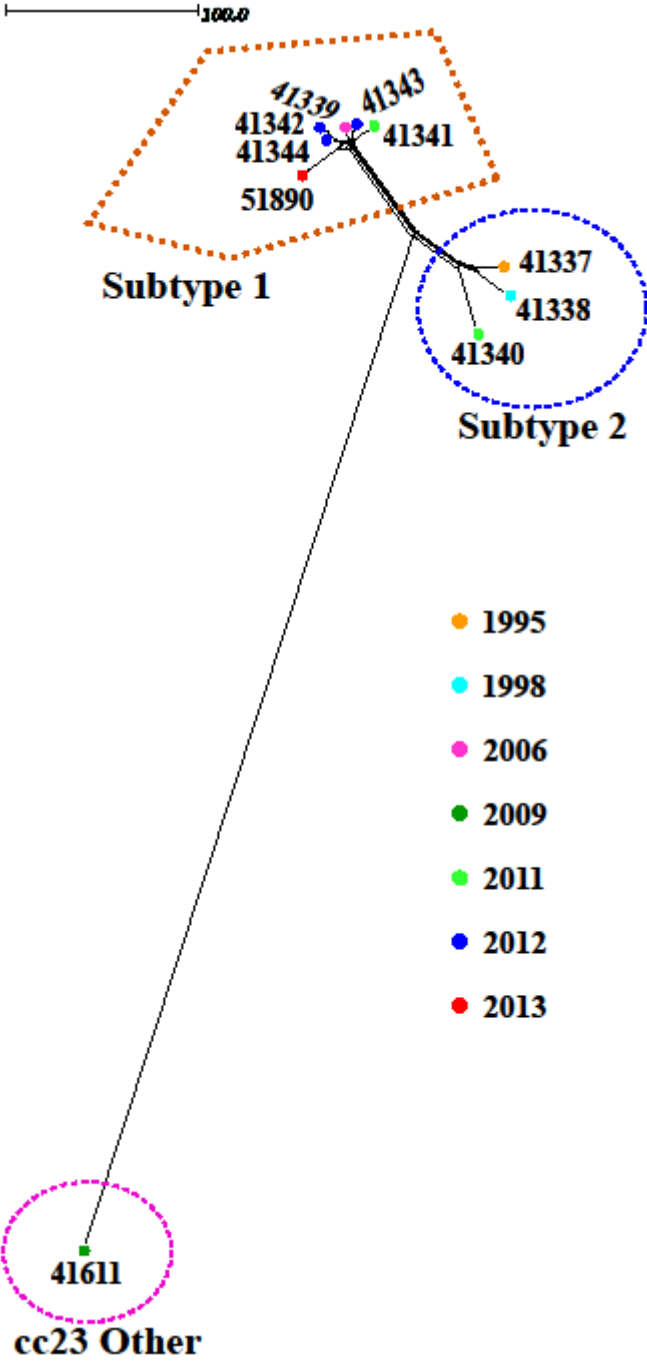

Supplement: 12866_2020_1760_MOESM2_ESM.pdf [file 12866_2020_1760_MOESM2_ESM.pdf]
